# Supplementary material for: Mind-Wandering during Personal Music Listening in Everyday Life: Music-Evoked Emotions Predict Thought Valence
Source: MDPI journal article supplement (doi:10.3390/ijerph182312321), 2021-11-24
Supplement: s1 [file s1]

## Supplementary Materials

**Table S1.** Music pieces features in the Spotify playlist.

| Title                                         | Artist                          |
|-----------------------------------------------|---------------------------------|
| A Walk                                        | Tycho                           |
| Aether                                        | Hildur Guðnadóttir              |
| Ambre                                         | Nils Frahm                      |
| Anakin's Theme                                | John Williams                   |
| Anandi                                        | Mychael Danna                   |
| Appa's Lesson                                 | Mychael Danna                   |
| Arrival of the Birds/Exodus                   | The Cinematic Orchestra         |
| Cambridge, 1963                               | Jóhann Jóhannsson               |
| Da Nessuna Parte                              | Paolo Cognetti                  |
| Daydream                                      | Nitin Sawhney                   |
| Dawn                                          | The Cinematic Orchestra         |
| Divenire                                      | Ludovico Einaudi                |
| Divorce Papers                                | Arcade Fire and Owen Pallett    |
| Dream 3 (in the midst of my life)             | Max Richter                     |
| Dream 13 (minus even)                         | Max Richter                     |
| Gabriel's Oboe                                | Ennio Morricone                 |
| Griet's Theme                                 | Alexandre Desplat               |
| Hoppipolla                                    | Sigur Rós                       |
| Impossible Island                             | Gaussian Curve                  |
| Infra 5                                       | Max Richter                     |
| Julia                                         | Ludovico Einaudi                |
| Love Theme                                    | Ennio Morricone                 |
| Lullaby from the Westcoast Sleepers           | Max Richter                     |
| Luminous                                      | Max Richter                     |
| Once Upon a Time in America (Deborah's Theme) | Ennio Morricone                 |
| Re                                            | Nils Frahm                      |
| Says                                          | Nils Frahm                      |
| The Black Dog and the Scottish Play           | Hilmar Örn Hilmarsson           |
| The Imitation Game                            | Alexandre Desplat               |
| The John Dunbar Theme                         | John Barry                      |
| The Prize of One's Life                       | James Horner                    |
| The Theory of Everything                      | Jóhann Jóhannsson               |
| Them                                          | Nils Frahm                      |
| Truman Sleeps                                 | Philip Glass, Burkhard Dallwitz |
| Turning Page (Instrumental)                   | Sleeping at Last                |
| Un Altro Sguardo                              | Paolo Cognetti                  |
| Una Mattina                                   | Ludovico Einaudi                |
| Wayward Sisters                               | Abel Korzeniowski               |
| Welcome Chris                                 | Andrea Guerra                   |
| Wrong Floor                                   | Cliff Martinez                  |
| Your Hand in Mine                             | Explosions in the Sky           |

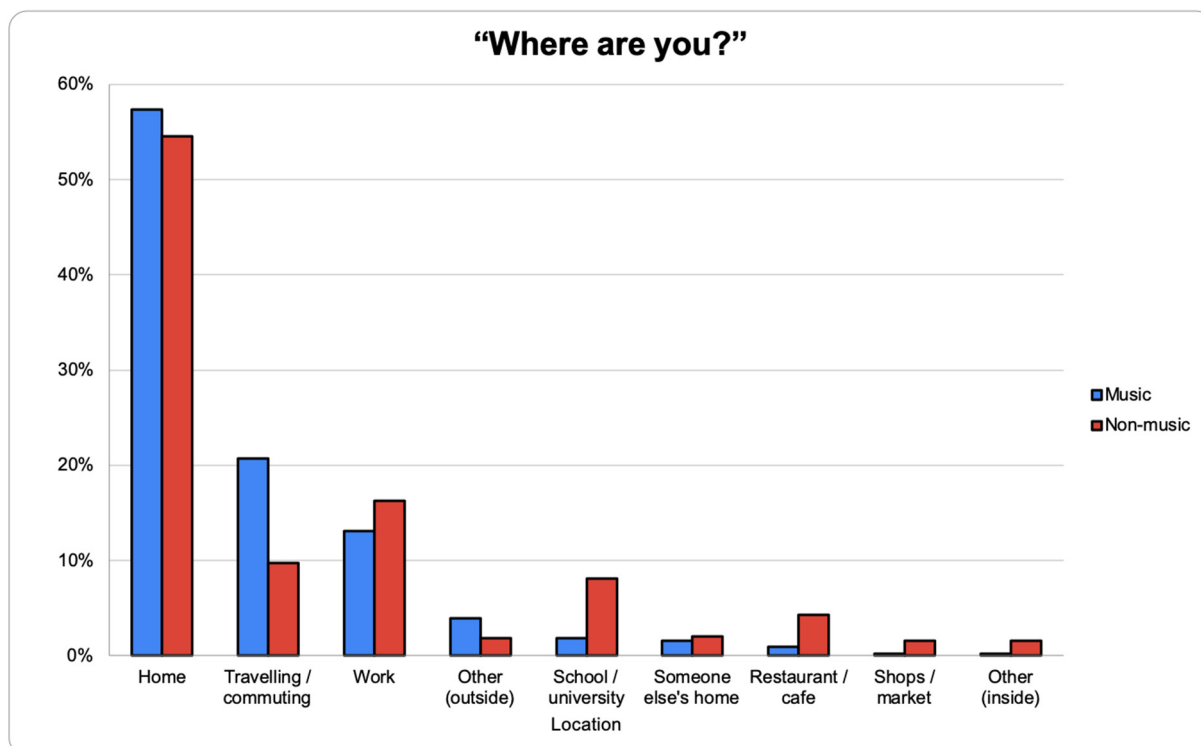

**Figure S1.** Locations where the ESRs took place as a function of music and non-music episodes.

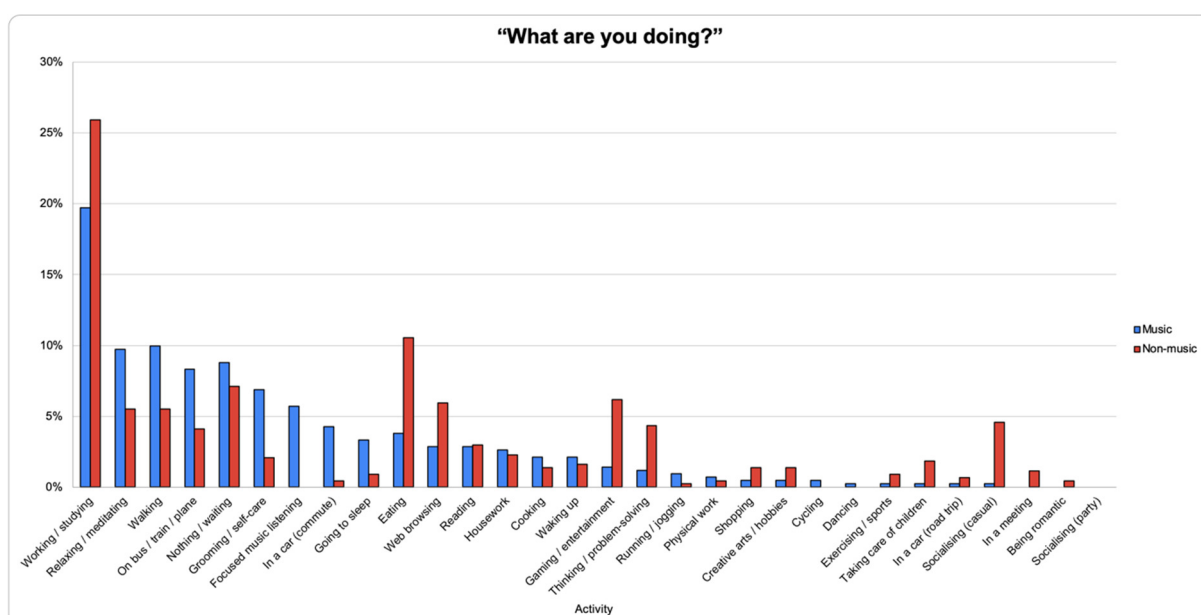

**Figure S2.** Main activities as a function of music and non-music episodes.

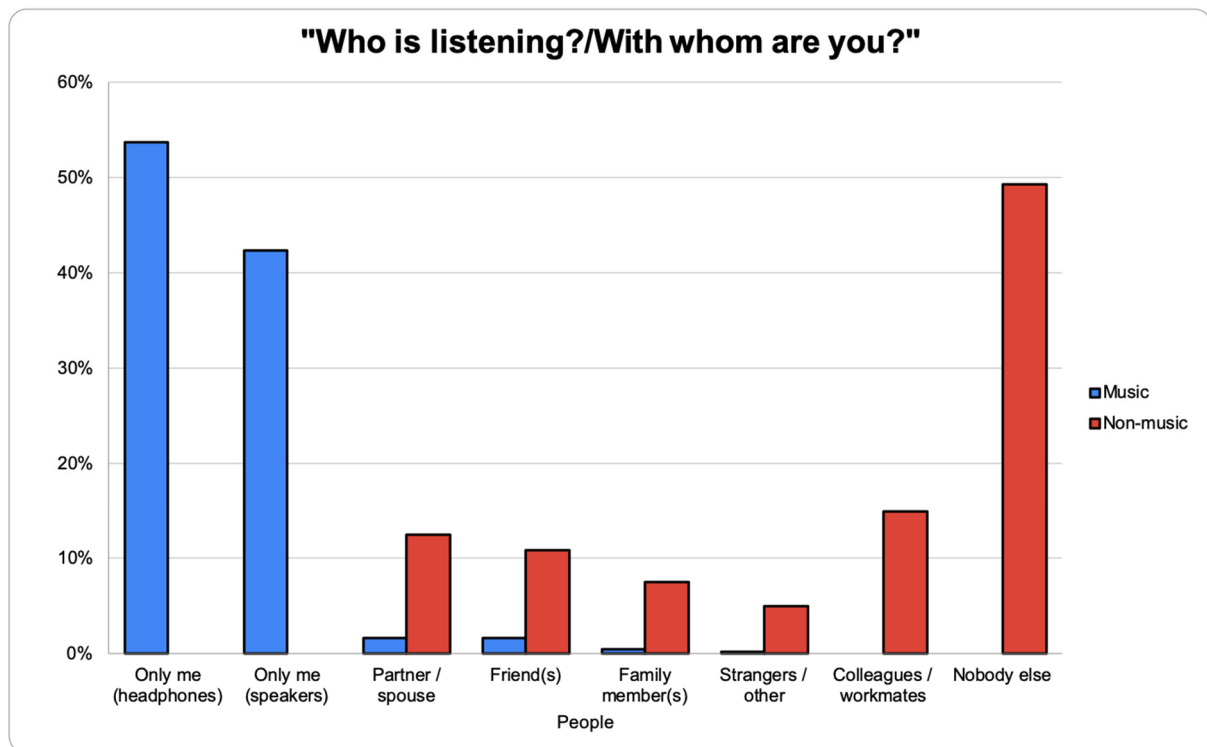

**Figure S3.** People as a function of music and non-music episodes.
